# Supplementary material
Source: PubMed Central journal article supplement (PMC2772158)
Supplement: NIHMS91228-supplement-1_si_001.pdf [file NIHMS91228-supplement-1_si_001.pdf]

## Supporting Information

### Reversibility of Covalent Electrophile-Protein Adducts and Chemical Toxicity

De Lin<sup>†</sup>, Sam Saleh<sup>‡</sup> and Daniel C. Liebler<sup>†‡\*</sup>

<sup>†</sup>Department of Biochemistry and <sup>‡</sup>Vanderbilt Institute for Chemical Biology, Vanderbilt

University School of Medicine, Nashville, Tennessee 37232

Scheme S1

Figures S1-S8

Scheme S1

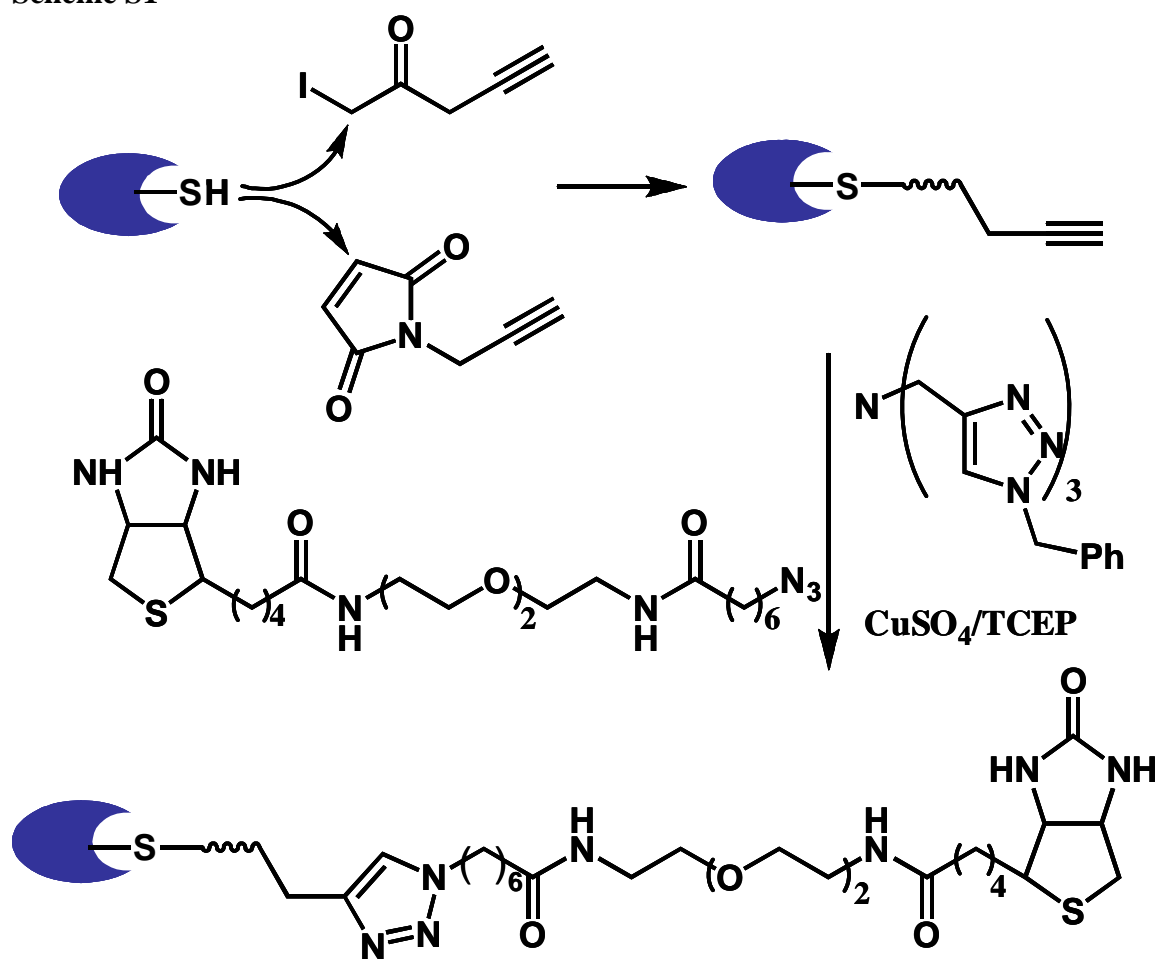

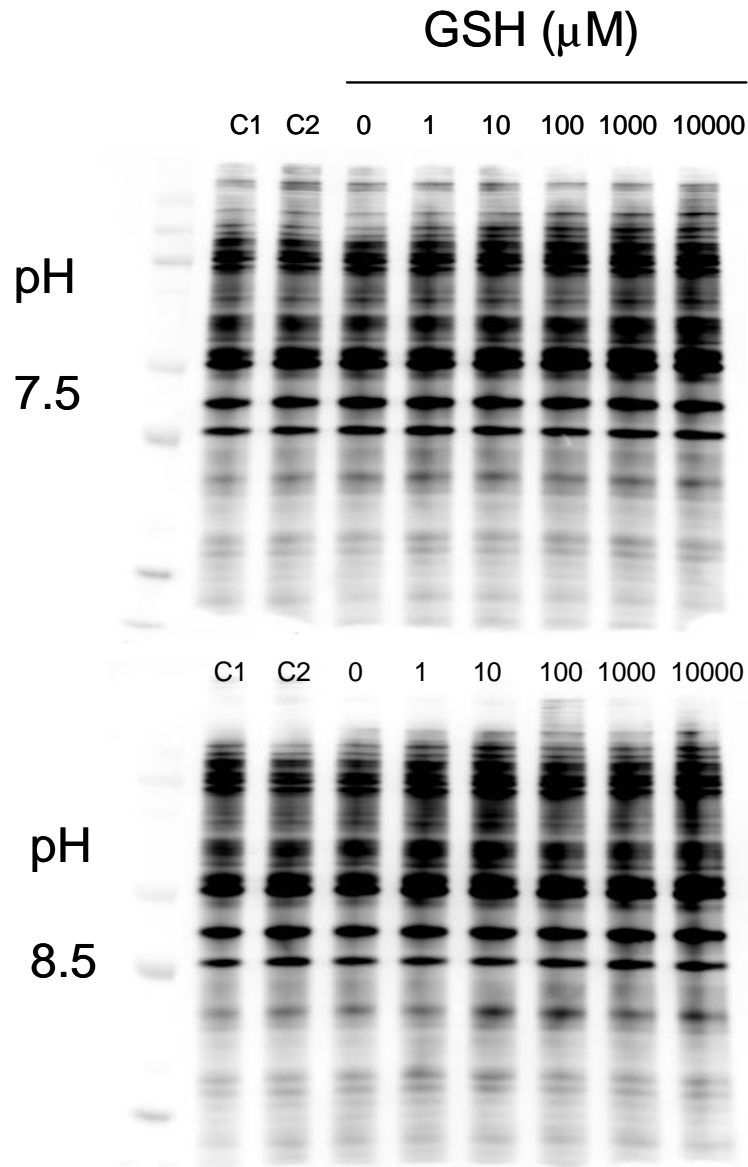

**Figure S1.** Stability of BMCC adducts from BMCC-pretreated HEK293 cell lysate (lysate treated with 10  $\mu\text{M}$  BMCC for 1 h at 37  $^{\circ}\text{C}$ ). The adduct-containing lysate protein was left either untreated (lane) or incubated with the indicated concentrations ( $\mu\text{M}$ ) of GSH for 1 h at pH 7.5 (upper panel) and 8.5 (lower panel) at 37  $^{\circ}\text{C}$ . Lane labeled C2 represent 2 h pretreatment of lysate with BMCC at 37  $^{\circ}\text{C}$ .

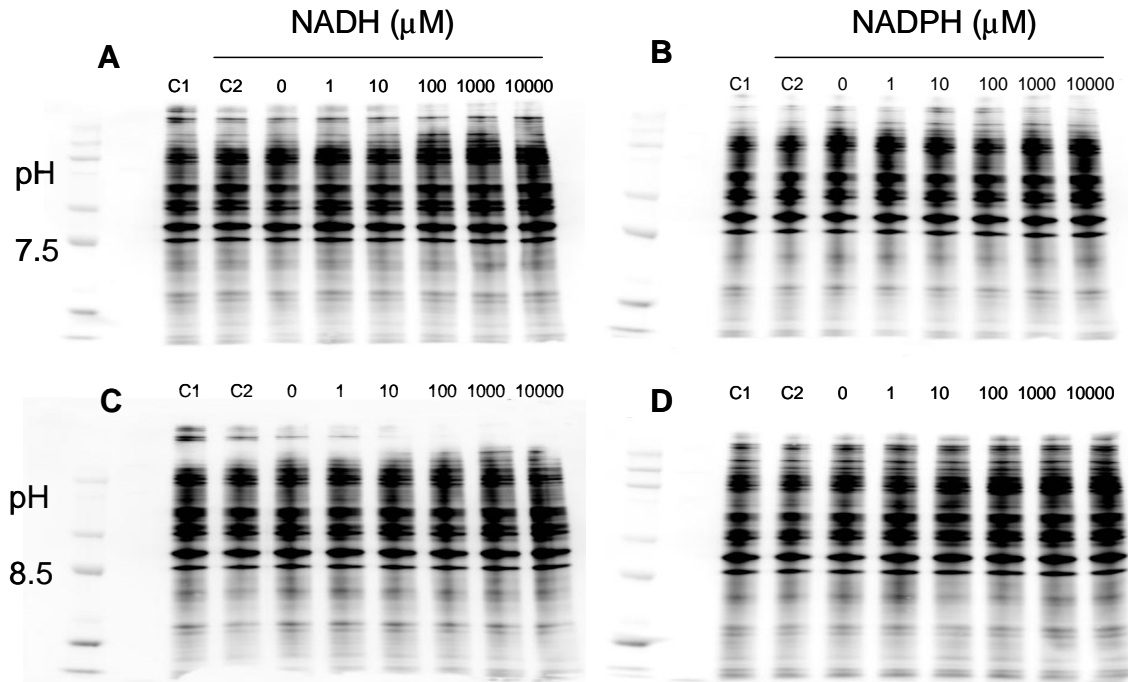

**Figure S2.** Stability of BMCC adducts from BMCC-pretreated HEK293 cell lysate (lysate treated with 10  $\mu\text{M}$  BMCC for 1 h). The adduct-containing lysate protein was left either untreated (lane) or incubated with the indicated concentrations ( $\mu\text{M}$ ) of NADH at pH 7.5 (A), 8.5 (C), NADPH at pH 7.5 (B), 8.5 (D) for 1 h at pH 7.5. Lanes labeled C2 represent 2 h pretreatment of lysate with BMCC at 37  $^{\circ}\text{C}$ .

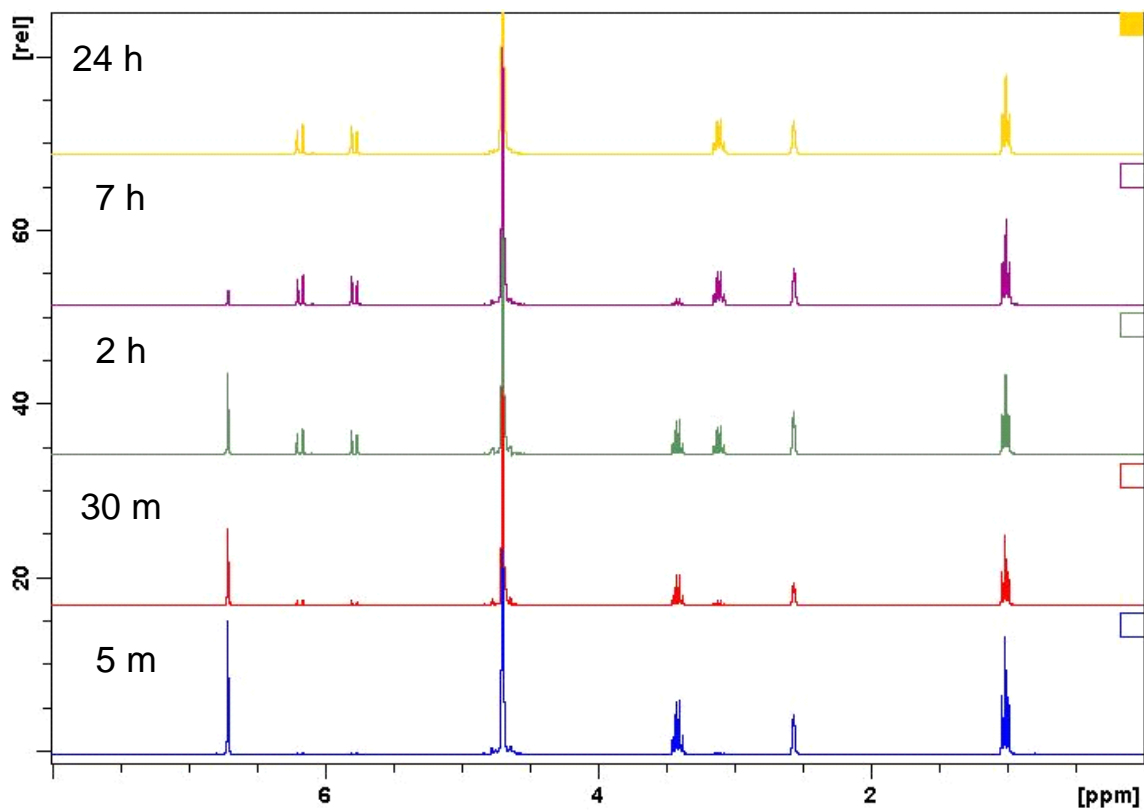

**Figure S3.** <sup>1</sup>H-NMR spectra for the conversion of NEM (10 mM) to its hydrolyzed acid form in 100 mM, pH 8.0 D<sub>2</sub>O phosphate buffer containing 10% d<sub>6</sub>-DMSO at 37 °C.

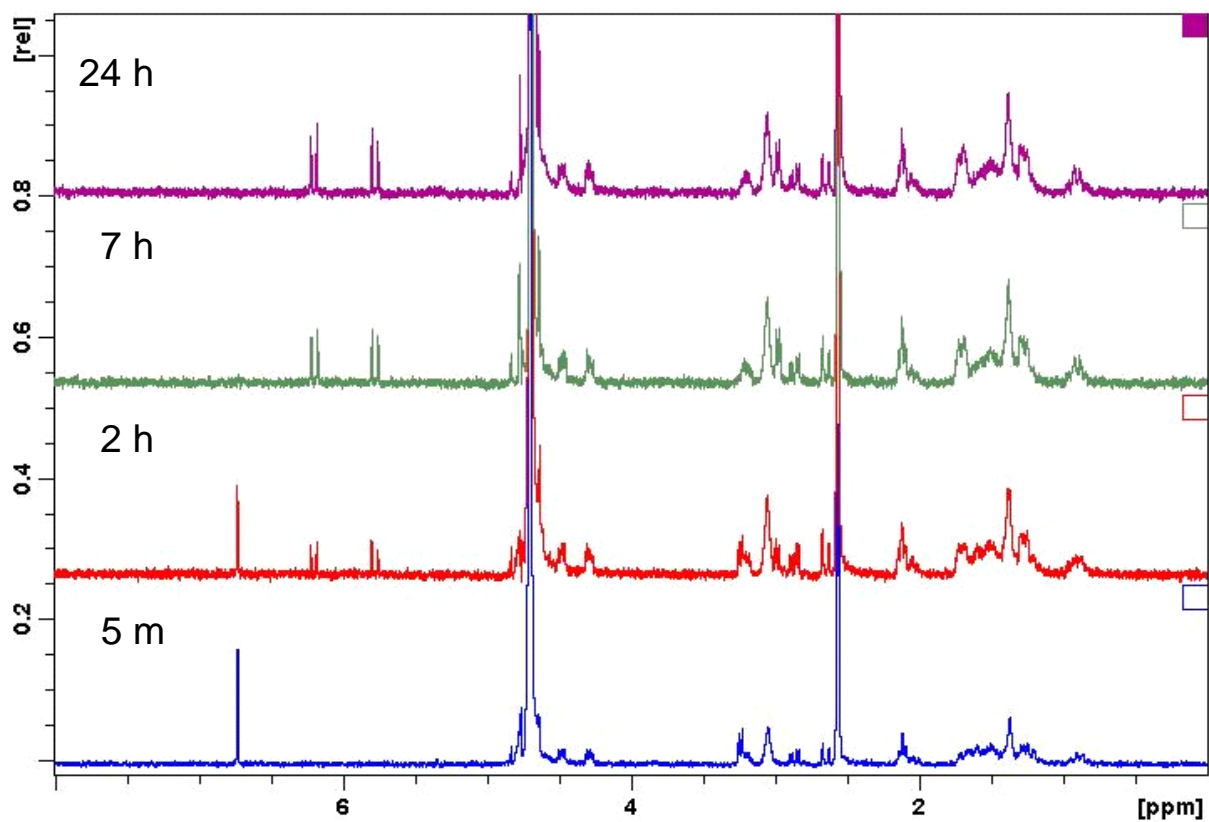

**Figure S4.** <sup>1</sup>H-NMR spectra for the conversion of BMCC (1 mM) to its acid form (BMCC-acid) in 100 mM, pH 8.0 D<sub>2</sub>O-phosphate buffer containing 10% d<sub>6</sub>-DMSO at 37 °C.

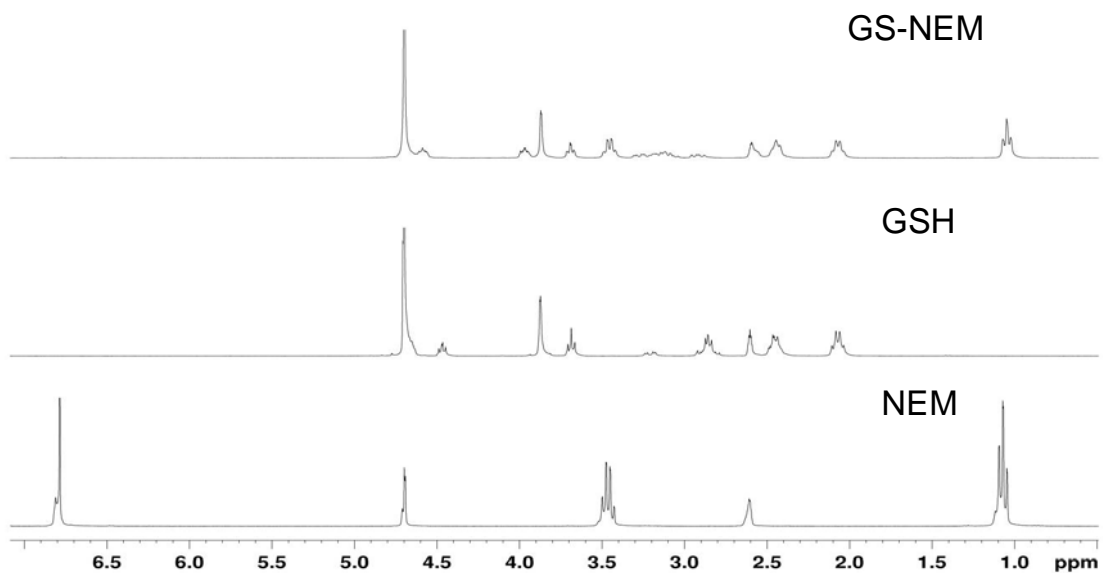

**Figure S5.**  $^1\text{H-NMR}$  spectra for the conversion of NEM (40 mM) to its GSH conjugate GS-NEM in  $\text{D}_2\text{O}$  containing 28%  $\text{d}_6\text{-DMSO}$  at room temperature.

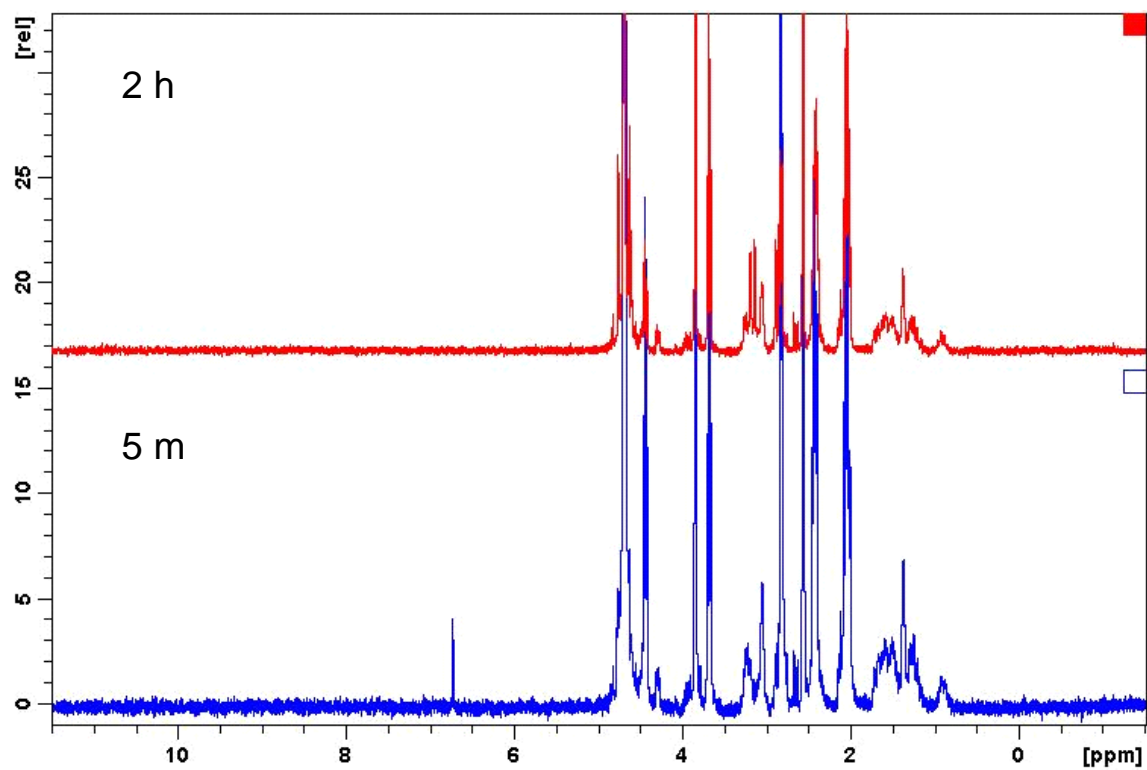

**Figure S6.** <sup>1</sup>H-NMR spectra recording the conversion of BMCC (1 mM) to its GSH conjugate GS-BMCC in D<sub>2</sub>O containing 10% d<sub>6</sub>-DMSO at room temperature.



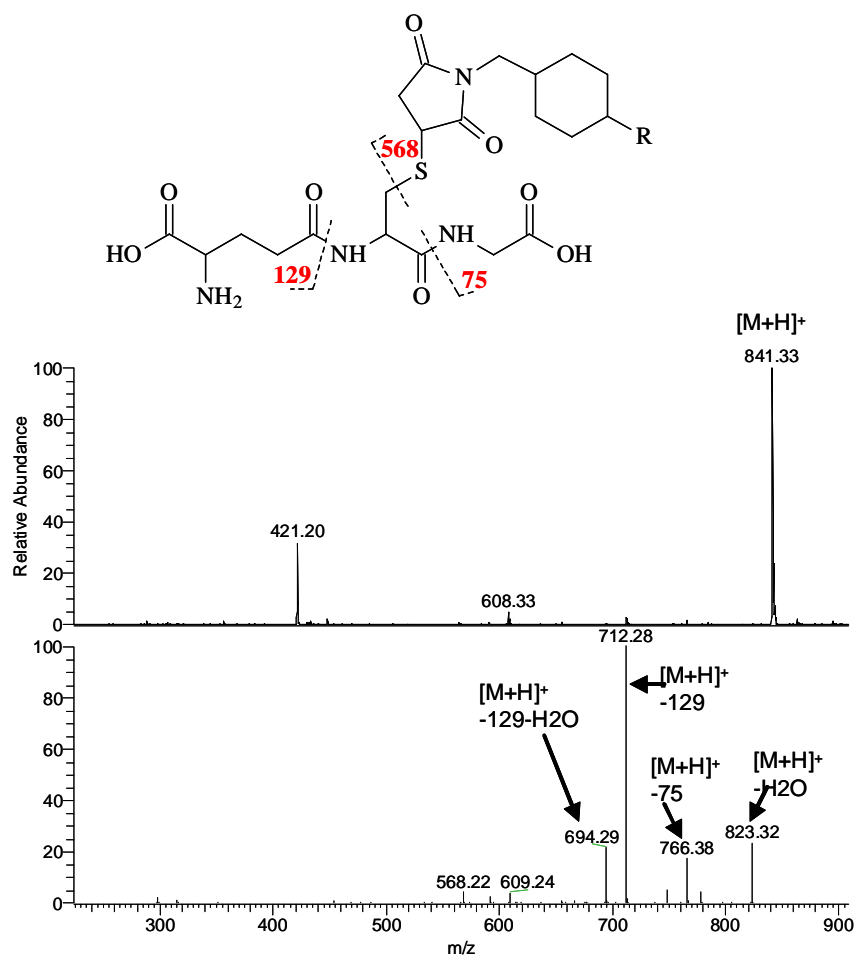

Figure S7. MS-MS of GS-BMCC.

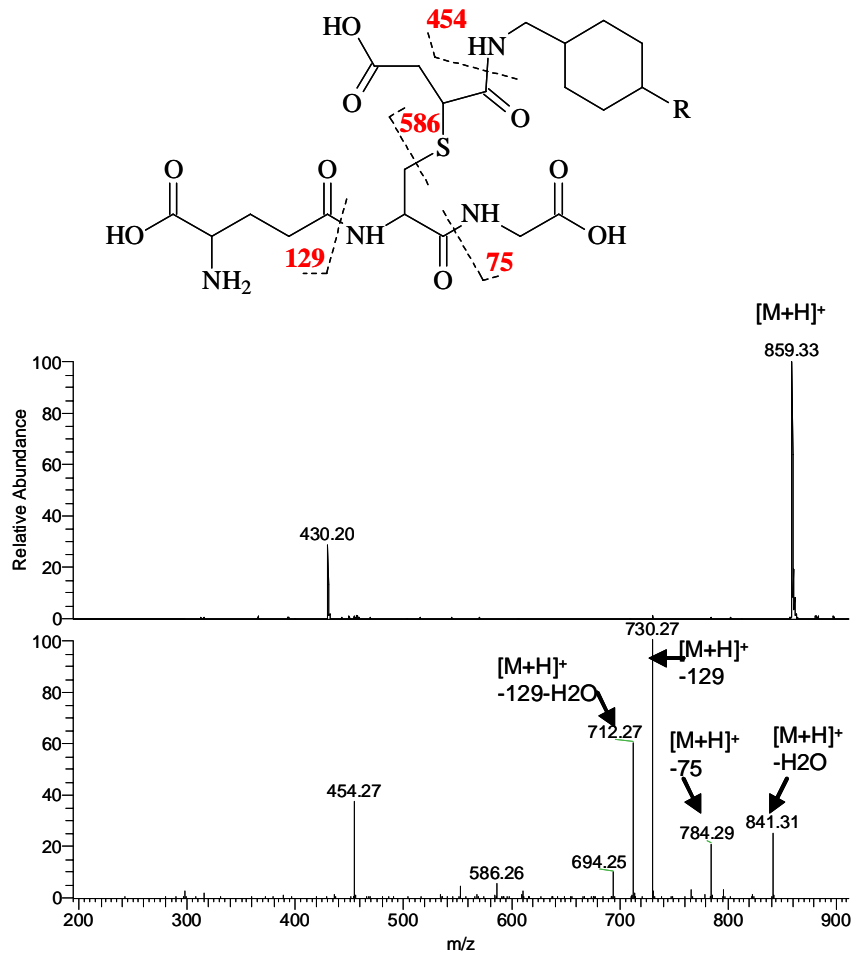

Figure S8. MS-MS of GS-BMCC-acid.
